# Supplementary material
Source: PubMed Central journal article supplement (PMC2958641)
Supplement: bph0160-1953-SD1.pdf [file bph0160-1953-SD1.pdf]

## Supporting Information

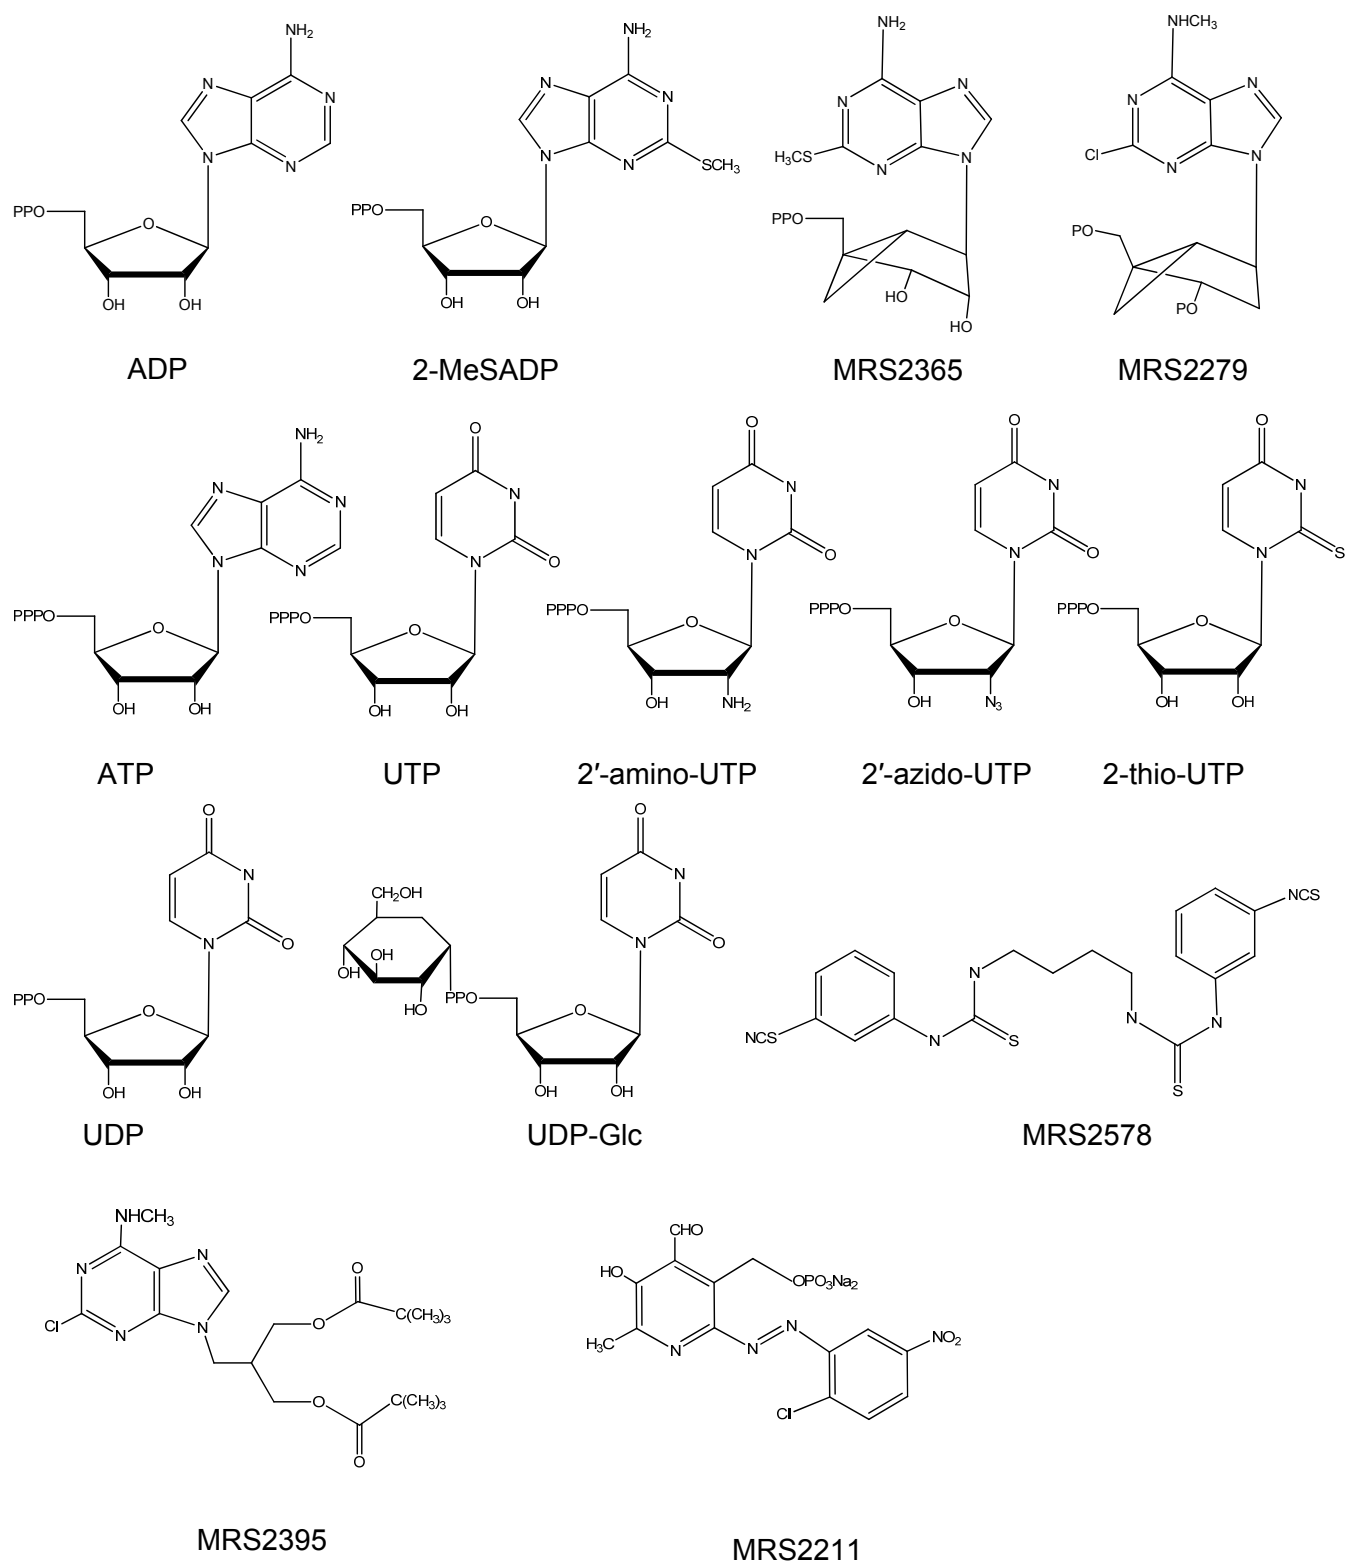

**Figure S1** Structures of the ligands used.

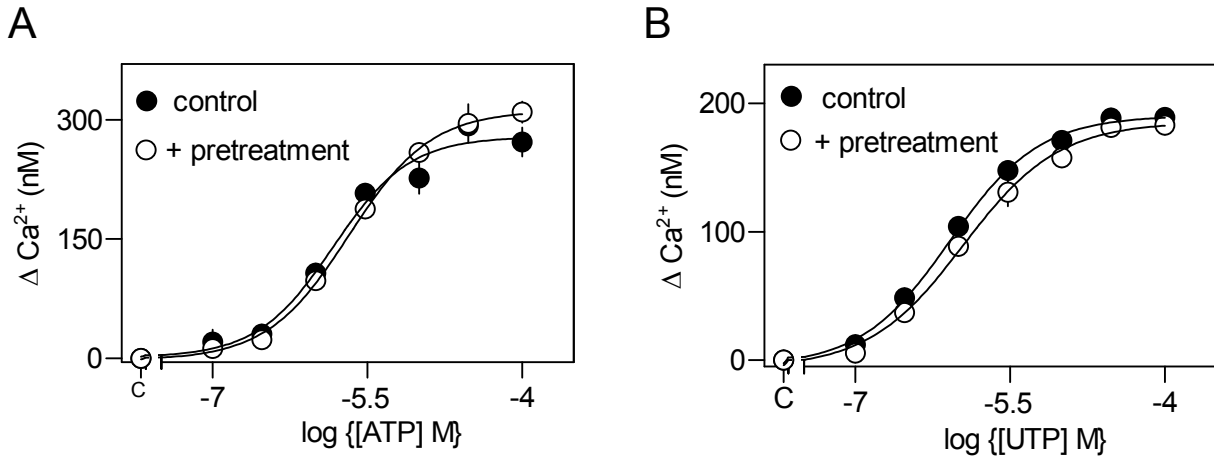

**Figure S2** Effects of an ATP/UTP-regenerating system on responses to ATP and UTP. Concentration-dependent effects of ATP (A) and UTP (B) on  $[Ca^{2+}]_i$  in ASMC in HBS alone or after pretreatment of cells and ligands with an ATP/UTP-regenerating system (as described in the text).

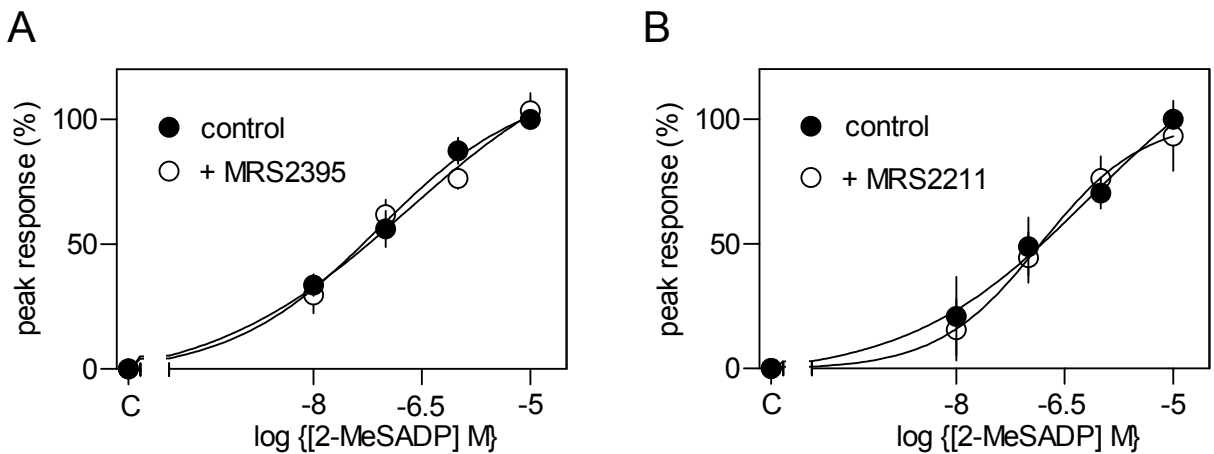

**Figure S3** Effects of MRS2395 and MRS2211 on the  $Ca^{2+}$  signals evoked by 2-MeSADP. Concentration-dependent effects of 2-MeSADP on  $[Ca^{2+}]_i$  alone or in the presence of MRS2395 (30  $\mu$ M, A) or MRS2211 (10  $\mu$ M, B). Results are expressed as percentages of the maximal response to 2-MeSADP alone.

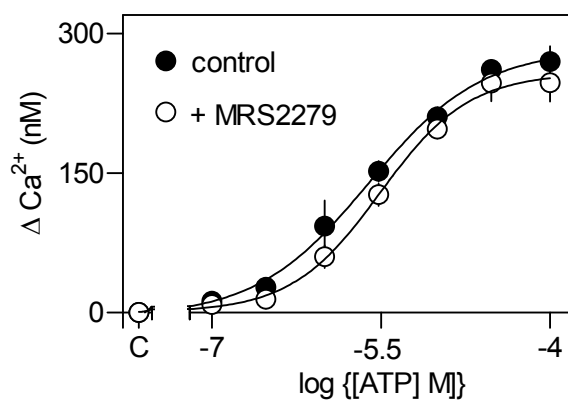

**Figure S4** Effects of MRS2279 on the Ca<sup>2+</sup> signals evoked by ATP. Concentration-dependent effects of ATP on [Ca<sup>2+</sup>]<sub>i</sub> alone or with MRS2279 (3 μM).

**Table S1** Primers used for quantitative PCR

| Gene    | Qiagen code                  | Catalogue number |
|---------|------------------------------|------------------|
| P2Y1    | Pn_P2ry1_2SG                 | QT01084587       |
| P2Y2    | Rn_P2ry2_2_SG                | QT01081164       |
| P2Y4    | Rn_P2ry4_1SG                 | QT00390873       |
| P2Y6    | Rn_P2ry6_1_SG                | QT01083425       |
| P2Y12   | Rn_P2ry12_1_SG               | QT00413287       |
| P2Y13   | Rn_RGD:1302941_1_SG          | QT00407841       |
| P2Y14   | Rn_P2ry14_1_SG               | QT00418327       |
| β-actin | Forward: GTCACCAACTGGGACGATA |                  |
|         | Reverse: GTCACCAACTGGGACGATA |                  |
